# Supplementary material for: High-throughput detection of ethanol-producing cyanobacteria in a microdroplet platform
Source: PubMed Central journal article supplement (PMC4424702; doi:10.1098/rsif.2015.0216), 2015-05-06
Supplement: rsif20150216supp2.pdf [file rsif20150216supp2.pdf]

## A. Droplet generation design

Fluorous oil + surfactant

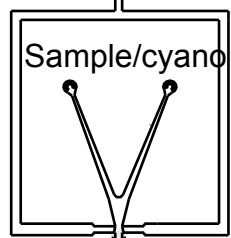

80 μm

80 μm

## B. Pico-injection design

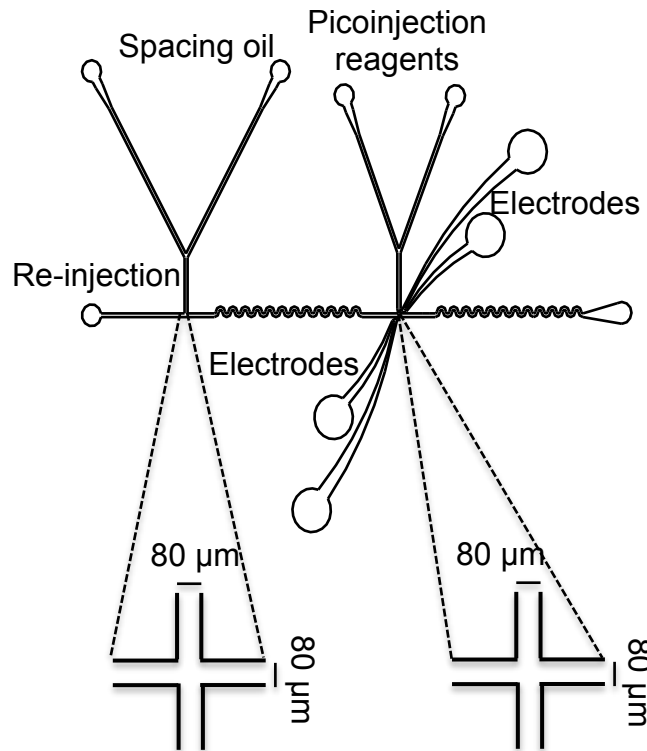

80 μm

80 μm

80 μm

80 μm

## C. Detection design

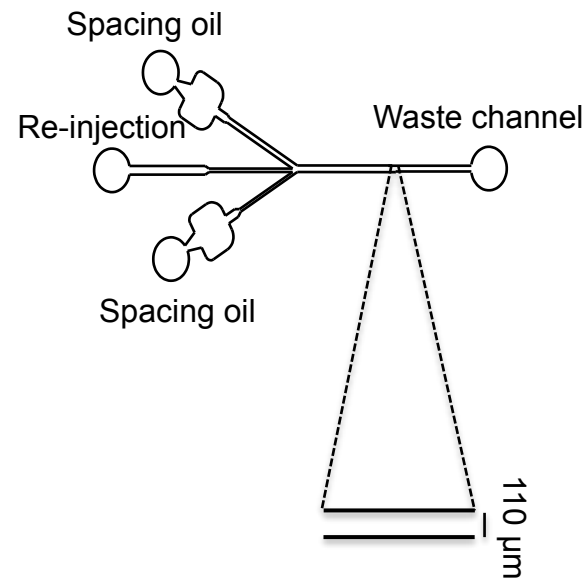

110 μm
