# Supplementary material for: High-throughput detection of ethanol-producing cyanobacteria in a microdroplet platform
Source: PubMed Central journal article supplement (PMC4424702; doi:10.1098/rsif.2015.0216), 2015-05-06

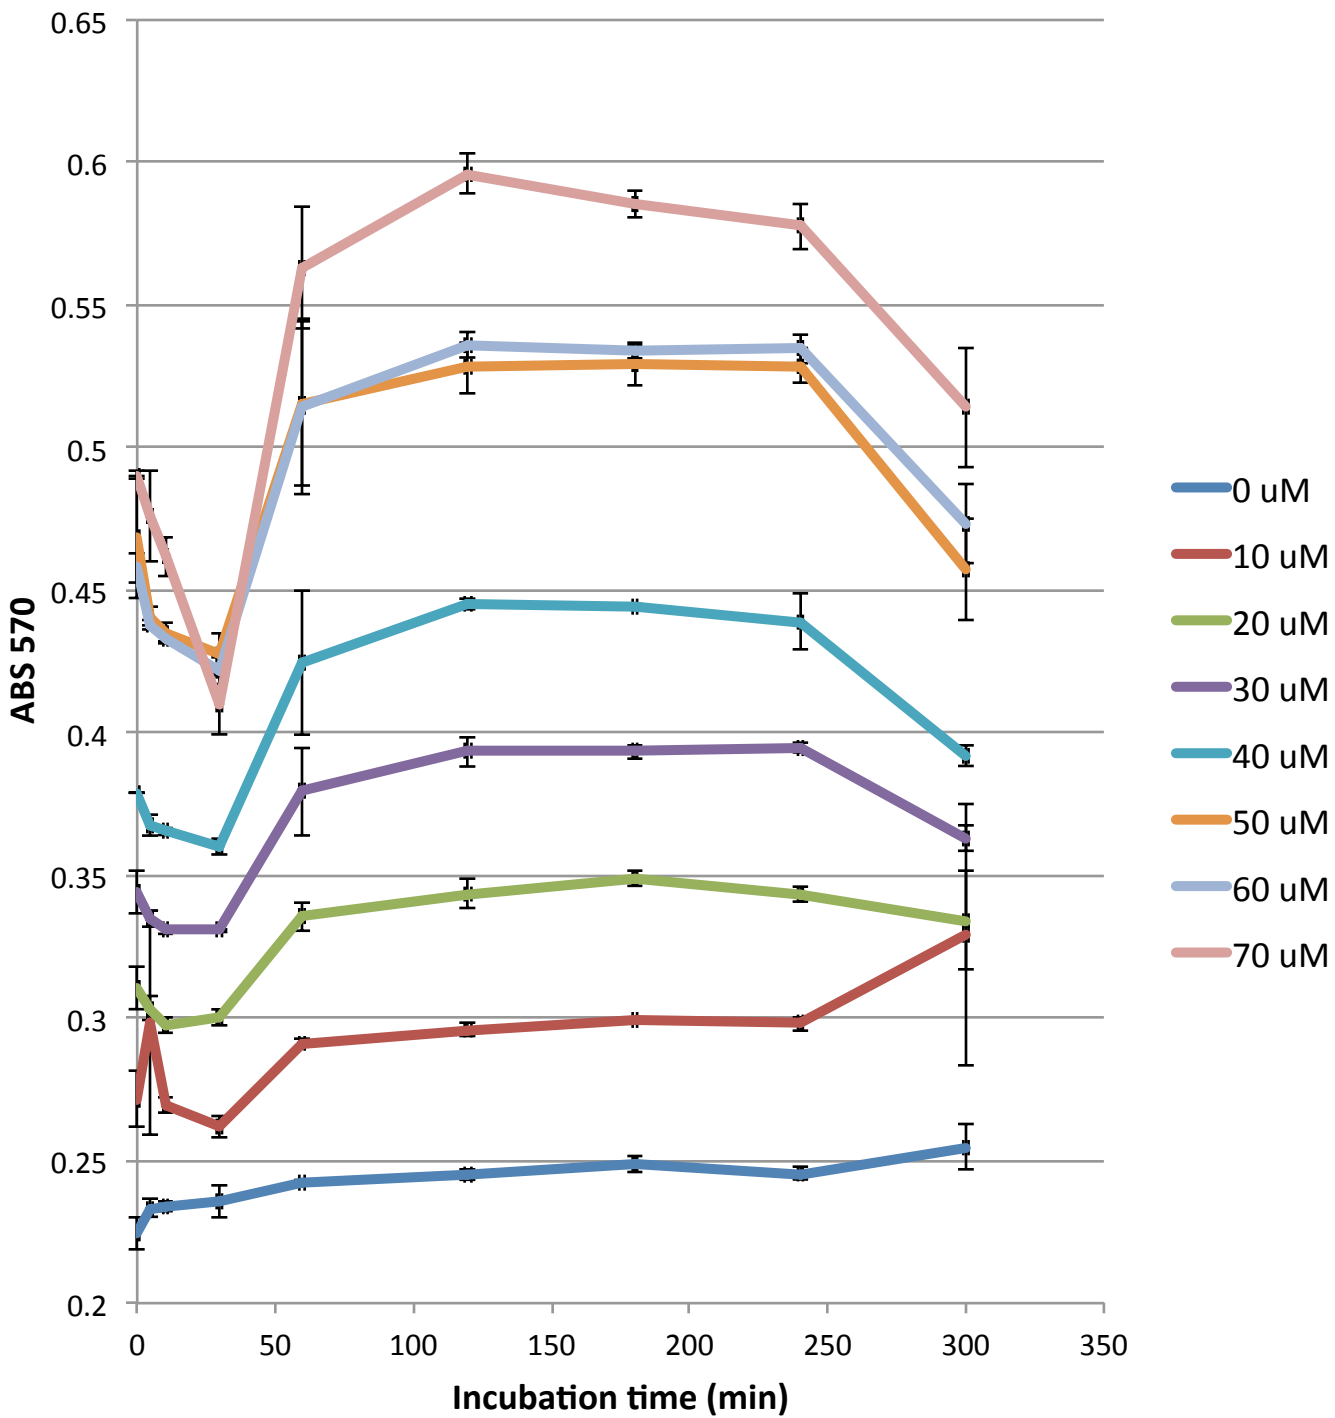

Supplement: rsif20150216supp5.pdf [file rsif20150216supp5.pdf]
